# Supplementary material for: Overexpressing GH3.1 and GH3.1L reduces susceptibility to Xanthomonas citri subsp. citri by repressing auxin signaling in citrus (Citrus sinensis Osbeck)
Source: PLoS One. 2019 Dec 12;14(12):e0220017. doi: 10.1371/journal.pone.0220017 (PMC6907806; doi:10.1371/journal.pone.0220017)
Supplement: S6 Table — (XLS) [file pone.0220017.s011.xls]

## Sheet: MapManExport
S6 Table. Differentially expressed genes directly involved in biostress in the 1-9 and L-5 transgenic line using MapMan tool.ND: Not detected.
MapMan BinCode	Name	Gene ID	Gene function	Log2(Fold change)
				Transgenic line vs WT
				1-9 line	L-5 line
20.1.2	stress.biotic.receptors	orange1.1t02158	disease resistance protein (TIR-NBS-LRR class)	ND	-7.674
20.1.2	stress.biotic.receptors	orange1.1t02163	TIR-NBS-LRR class of disease resistance protein	1.674	ND
20.1.2	stress.biotic.receptors	cs5g18230	Toll-Interleukin-Resistance (TIR) domain family protein	2.044	1.717
20.1.2	stress.biotic.receptors	cs5g22390	disease resistance protein (TIR-NBS-LRR class)	-1.453	-1.231
20.1.3	stress.biotic.signalling	orange1.1t03802	Component of R gene-mediated disease resistance in Arabidopsis thaliana with homology to eukaryotic lipases.; enhanced disease susceptibility 1 (EDS1)	1.448	2.883
20.1.3	stress.biotic.signalling	cs1g17210	JAZ1 is a nuclear-localized protein involved in jasmonate signaling	1.173	2.371
20.1.3	stress.biotic.signalling	cs1g17220	JAZ1 is a nuclear-localized protein involved in jasmonate signaling	1.143	ND
20.1.3	stress.biotic.signalling	cs4g07130	jasmonate-zim-domain protein 1	ND	2.148
20.1.3.1	stress.biotic.signalling.MLO-like	cs7g27330	homologs of the barley mildew resistance locus o (MLO) protein	ND	-1.007
20.1.3.1	stress.biotic.signalling.MLO-like	cs8g16910	homologs of the barley mildew resistance locus o (MLO) protein	ND	1.395
20.1.5	stress.biotic.regulation of transcription	cs5g20350	Disease resistance protein (TIR-NBS-LRR class) family	1.228	ND
20.1.7	stress.biotic.PR-proteins	cs6g01070	NB-ARC domain-containing disease resistance protein	2.089	1.506
20.1.7	stress.biotic.PR-proteins	cs9g12880	Leucine-rich repeat protein kinase family protein	-1.135	ND
20.1.7	stress.biotic.PR-proteins	cs9g14710	Chitinase A (class III) expressed exclusively under environmental stress conditions	1.132	ND
20.1.7	stress.biotic.PR-proteins	cs9g18740	disease resistance family protein / LRR family protein	2.64	2.459
20.1.7	stress.biotic.PR-proteins	orange1.1t01829	disease resistance protein (TIR-NBS-LRR class)	1.005	ND
20.1.7	stress.biotic.PR-proteins	orange1.1t01839	disease resistance protein (TIR-NBS-LRR class)	1.754	ND
20.1.7	stress.biotic.PR-proteins	orange1.1t02189	Disease resistance protein (TIR-NBS-LRR class) family	2.177	ND
20.1.7	stress.biotic.PR-proteins	orange1.1t02924	disease resistance family protein / LRR family protein	1.417	ND
20.1.7	stress.biotic.PR-proteins	orange1.1t03694	disease resistance protein (TIR-NBS-LRR class)	2.378	ND
20.1.7	stress.biotic.PR-proteins	orange1.1t03732	NB-ARC domain-containing disease resistance protein	-1.03	ND
20.1.7	stress.biotic.PR-proteins	orange1.1t03734	NB-ARC domain-containing disease resistance protein	-1.059	ND
20.1.7	stress.biotic.PR-proteins	orange1.1t04296	Disease resistance protein (TIR-NBS-LRR class) family	1.541	ND
20.1.7	stress.biotic.PR-proteins	orange1.1t04356	disease resistance family protein / LRR family protein	-1.833	ND
20.1.7	stress.biotic.PR-proteins	orange1.1t04443	disease resistance protein (TIR-NBS-LRR class)	1.907	ND
20.1.7	stress.biotic.PR-proteins	orange1.1t04568	disease resistance protein (TIR-NBS-LRR class)	1.29	ND
20.1.7	stress.biotic.PR-proteins	orange1.1t04571	Disease resistance protein (TIR-NBS-LRR class) family	1.896	ND
20.1.7	stress.biotic.PR-proteins	orange1.1t05203	NB-ARC domain-containing disease resistance protein	1.665	ND
20.1.7	stress.biotic.PR-proteins	cs1g09470	NB-ARC domain-containing disease resistance protein	-1.155	ND
20.1.7	stress.biotic.PR-proteins	cs1g11390	Disease resistance protein (CC-NBS-LRR class) family	2.006	ND
20.1.7	stress.biotic.PR-proteins	cs1g12170	Disease resistance protein (CC-NBS-LRR class) family	-1.165	ND
20.1.7	stress.biotic.PR-proteins	cs1g18380	NB-ARC domain-containing disease resistance protein	-1.056	ND
20.1.7	stress.biotic.PR-proteins	cs1g18940	Disease resistance protein (TIR-NBS-LRR class) family	1.456	ND
20.1.7	stress.biotic.PR-proteins	cs1g22350	disease resistance protein (TIR-NBS-LRR class)	1.015	ND
20.1.7	stress.biotic.PR-proteins	cs2g12470	Leucine-rich repeat (LRR) family protein	-1.511	ND
20.1.7	stress.biotic.PR-proteins	cs3g05740	Disease resistance protein (TIR-NBS-LRR class) family	1.21	ND
20.1.7	stress.biotic.PR-proteins	cs3g06300	receptor like protein 6 (RLP6)	-1.089	1.2
20.1.7	stress.biotic.PR-proteins	cs4g07730	NB-ARC domain-containing disease resistance protein	-1.125	ND
20.1.7	stress.biotic.PR-proteins	cs5g17280	disease resistance protein (TIR-NBS-LRR class)	1.681	ND
20.1.7	stress.biotic.PR-proteins	cs5g19240	disease resistance protein (TIR-NBS-LRR class)	2.18	1.563
20.1.7	stress.biotic.PR-proteins	cs5g19400	disease resistance protein (TIR-NBS-LRR class)	1.276	ND
20.1.7	stress.biotic.PR-proteins	cs5g19470	disease resistance protein (TIR-NBS-LRR class)	1.19	ND
20.1.7	stress.biotic.PR-proteins	cs5g20360	disease resistance protein (TIR-NBS-LRR class)	1.541	ND
20.1.7	stress.biotic.PR-proteins	cs5g20370	Disease resistance protein (TIR-NBS-LRR class) family	1.305	ND
20.1.7	stress.biotic.PR-proteins	cs5g21020	NB-ARC domain-containing disease resistance protein	-1.89	ND
20.1.7	stress.biotic.PR-proteins	cs5g22460	disease resistance protein (TIR-NBS-LRR class)	1.826	ND
20.1.7	stress.biotic.PR-proteins	cs9g13300	NB-ARC domain-containing disease resistance protein	ND	1.963
20.1.7	stress.biotic.PR-proteins	orange1.1t04289	disease resistance protein (TIR-NBS-LRR class)	ND	1.553
20.1.7	stress.biotic.PR-proteins	orange1.1t04653	NB-ARC domain-containing disease resistance protein	ND	1.214
20.1.7	stress.biotic.PR-proteins	cs2g19600	receptor like protein 7 (RLP7)	ND	-1.786
20.1.7	stress.biotic.PR-proteins	cs3g05850	RECOGNITION OF PERONOSPORA PARASITICA 8 (RPP8) response to defense response, plant-type hypersensitive response	ND	4.602
20.1.7	stress.biotic.PR-proteins	cs5g13820	receptor like protein 33 (RLP33)	ND	1.442
20.1.7.6.1	stress.biotic.PR-proteins.proteinase inhibitors.trypsin inhibitor	cs5g13890	Kunitz family trypsin and protease inhibitor protein	3.41	2.12
20.1.7.6.1	stress.biotic.PR-proteins.proteinase inhibitors.trypsin inhibitor	cs5g13960	Kunitz family trypsin and protease inhibitor protein	3.156	ND
20.1.7.6.1	stress.biotic.PR-proteins.proteinase inhibitors.trypsin inhibitor	cs5g16920	Kunitz family trypsin and protease inhibitor protein	2.689	ND
20.1.7.6.1	stress.biotic.PR-proteins.proteinase inhibitors.trypsin inhibitor	cs1g09420	Kunitz family trypsin and protease inhibitor protein	ND	1.773
20.1.7.6.1	stress.biotic.PR-proteins.proteinase inhibitors.trypsin inhibitor	cs5g16780	Kunitz family trypsin and protease inhibitor protein	ND	-1.145
20.1.7.6.1	stress.biotic.PR-proteins.proteinase inhibitors.trypsin inhibitor	cs5g16850	Kunitz family trypsin and protease inhibitor protein	ND	1.025
20.1.7.10	stress.biotic.PR-proteins.NPR	cs7g18610	Encodes a ankyrin repeat BTB/POZ domain-containing protein with 36% sequence identity with NPR1	ND	1.193
